# Supplementary material
Source: Springer Nature journal article supplement (https://www.springermedizin.de/resource/supplementary/12957_2013_1417_MOESM3_ESM.pdf/9562534)
Supplement: MOESM3 [file 9562534]

01 02 03 04 05 06 07 08 09 10 11 12

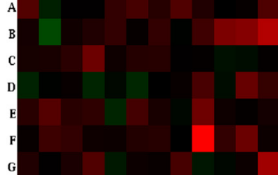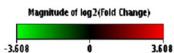

| Layout   | 01            | 02              | 03             | 04              | 05             | 06            | 07            | 08                | 09             | 10               | 11              | 12             |                |
|----------|---------------|-----------------|----------------|-----------------|----------------|---------------|---------------|-------------------|----------------|------------------|-----------------|----------------|----------------|
| <b>A</b> | AKT1<br>2.24  | ANGPT1<br>-1.34 | ANGPT2<br>1.02 | ANGPTL3<br>1.03 | ANPTL4<br>1.64 | ANPEP<br>1.97 | BAI1<br>1.45  | CCL11<br>2.18     | CCL2<br>1.38   | CDH5<br>-1.00    | COL18A1<br>1.06 | COL4A3<br>2.15 |                |
| <b>B</b> | CXCL1<br>1.22 | CXCL10<br>-2.01 | CXCL3<br>1.17  | CXCL5<br>1.38   | CXCL6<br>1.64  | CXCL9<br>1.06 | TYMP<br>1.64  | S1PR1<br>-1.01    | EFNA1<br>1.85  | EFNA3<br>3.39    | EFNB2<br>3.69   | EGF<br>5.86    |                |
| <b>C</b> | ENG<br>1.23   | EPHB4<br>1.27   | EREG<br>1.50   | FGF1<br>2.87    | FGF2<br>1.14   | FGFR3<br>1.43 | FIGF<br>1.46  | FLT1<br>1.02      | HAND2<br>1.03  | HGF<br>-1.17     | HIF1A<br>-1.12  | HPSE<br>1.05   |                |
| <b>D</b> | ID1<br>-1.39  | ID3<br>-1.02    | IFNA1<br>1.08  | IFNB1<br>-1.42  | IFNG<br>-1.08  | IGF1<br>-1.45 | IL3B<br>1.01  | IL6<br>1.08       | IL8<br>2.03    | ITGAV<br>-1.13   | ITGB3<br>2.72   | JAG1<br>1.65   |                |
| <b>E</b> | KDR<br>1.48   | LAMAS<br>2.28   | LECT1<br>1.48  | LEP<br>1.56     | MDK<br>-1.42   | MMP2<br>1.96  | MMP9<br>1.27  | MMP9<br>-1.06     | NOTCH4<br>2.92 | NRP1<br>12.20    | NRP2<br>1.14    | PDGFA<br>1.03  | PECAM1<br>1.22 |
| <b>F</b> | PF4<br>1.08   | PGF<br>1.82     | PLAU<br>1.63   | PLG<br>1.16     | PLXDC1<br>1.11 | PROK2<br>1.41 | PTGS1<br>1.44 | SERPINF1<br>-1.00 | SPHK1<br>12.20 | STAB1<br>1.62    | TEK<br>2.83     | TGFA<br>1.13   |                |
| <b>G</b> | TGFB1<br>1.38 | TGFB2<br>1.01   | TGFB1<br>1.29  | THBS1<br>2.21   | THBS2<br>-1.26 | TIMP1<br>1.12 | TIMP2<br>1.08 | TIMP3<br>2.00     | TNF<br>-1.24   | TNFAIP2<br>-1.05 | VEGFA<br>1.13   | VEGFC<br>4.94  |                |

Group 1 vs. Control Group

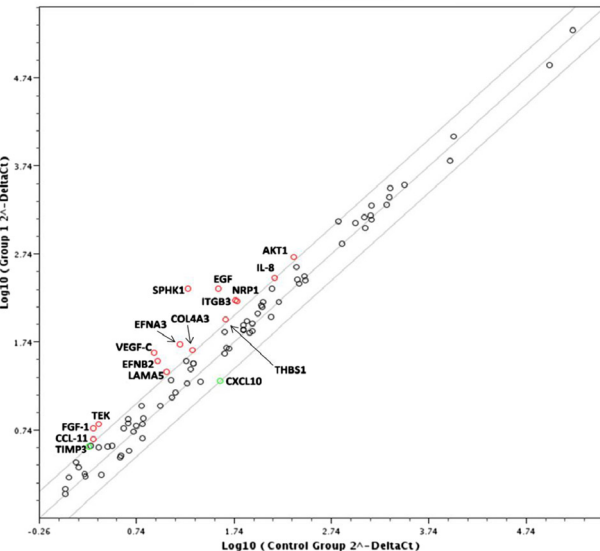

| Gene symbol                 | Description                                                 | Fold-regulation |
|-----------------------------|-------------------------------------------------------------|-----------------|
| <b>GENES UP-REGULATED</b>   |                                                             |                 |
| SPHK1                       | Sphingosine kinase 1                                        | 12.196          |
| EGF                         | Epidermal growth factor                                     | 5.8563          |
| VEGFC                       | Vascular Endothelial Growth Factor-C                        | 4.9417          |
| NRP1                        | Neuropilin 1                                                | 2.9214          |
| FGF1                        | Fibroblast growth factor                                    | 2.8712          |
| LAMAS                       | Laminin, alpha 5                                            | 2.2842          |
| COL4A3                      | Collagen, type IV, alpha 3 (Goodpasture antigen)            | 2.1485          |
| IL8                         | Interleukin-8                                               | 2.035           |
| EFNB2                       | Ephrin-B2                                                   | 3.6893          |
| EFNA3                       | Ephrin-A3                                                   | 3.3909          |
| TEK                         | TEK tyrosine kinase, endothelial                            | 2.835           |
| ITGB3                       | Integrin, beta 3 (platelet glycoprotein IIIa, antigen CD61) | 2.7195          |
| AKT1                        | V-akt murine thymoma viral oncogene homolog 1               | 2.2372          |
| THBS1                       | Thrombospondin 1                                            | 2.2064          |
| CCL11                       | Chemokine (C-C motif) ligand 11                             | 2.1785          |
| TIMP3                       | TIMP metalloproteinase inhibitor 3                          | 2               |
| <b>GENES DOWN-REGULATED</b> |                                                             |                 |
| CXCL10                      | Chemokine (C-X-C motif) ligand 10                           | -2.0139         |
